# Supplementary material for: Liver ubiquitome uncovers nutrient-stress-mediated trafficking and secretion of complement C3
Source: PubMed Central journal article supplement (PMC5133979; doi:10.1038/cddis.2016.312), 2016-10-13
Supplement: cddis2016312x8.pdf [file cddis2016312x8.pdf]

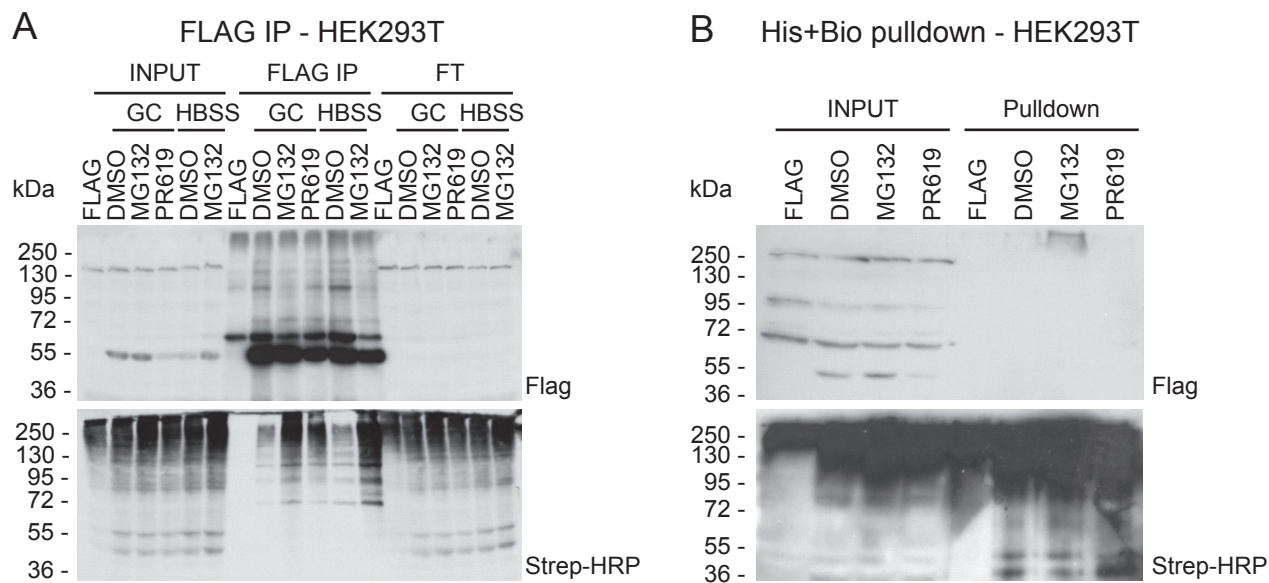

Figure S7, Magliarelli et al 2016
