# Supplementary material for: Liver ubiquitome uncovers nutrient-stress-mediated trafficking and secretion of complement C3
Source: PubMed Central journal article supplement (PMC5133979; doi:10.1038/cddis.2016.312), 2016-10-13

FLAG IP - HEK293T

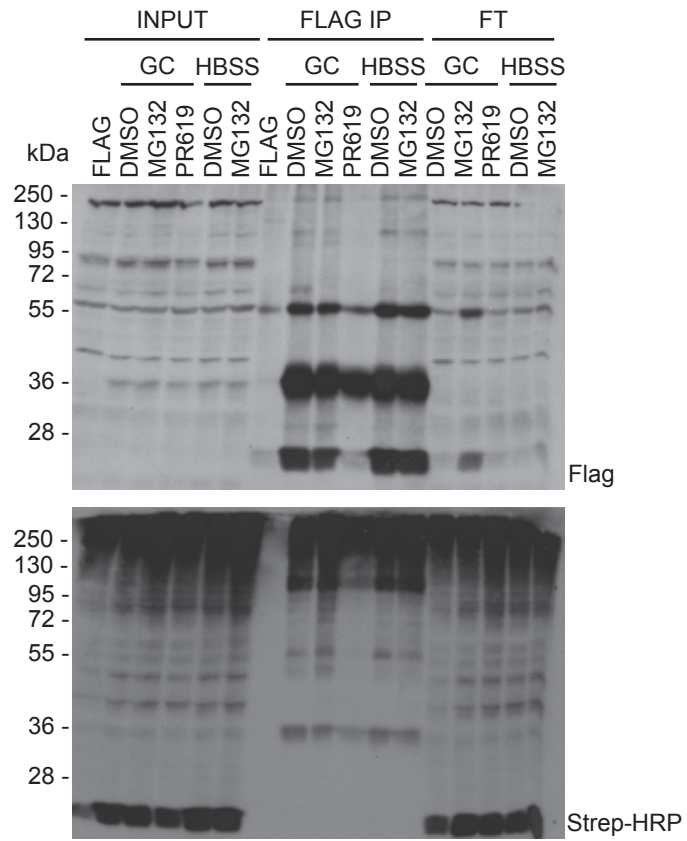

Supplement: cddis2016312x11.pdf [file cddis2016312x11.pdf]
